# Supplementary material for: Enhanced electrochemical performance of barium hexaferrite nanoplates by Zn2+ doping serving as anode materials
Source: Royal Society of Chemistry journal article supplement (doi:10.1039/c5ra12127b), 2015-01-01
Supplement: c5ra12127b1.pdf [file c5ra12127b1.pdf]

## Supporting Information

### **Enhanced Electrochemical Performances of Barium Hexaferrite Nanoplates by Zn<sup>2+</sup> Doping Serving as Anode Material**

Chenxi Hu, Song Qiu, Guixia Lu, Huili Cao, Hailong Lv, Shimei Guo and Jiurong Liu,\*

Key Laboratory for Liquid–Solid Structural Evolution and Processing of Materials,  
Ministry of Education and School of Materials Science and Engineering, Shandong  
University, Jinan, Shandong 250061, China

**\* Corresponding Author**

E-mail: [jrliu@sdu.edu.cn](mailto:jrliu@sdu.edu.cn) (J. L.); Tel.: +86-531-88390236 (J. L.)

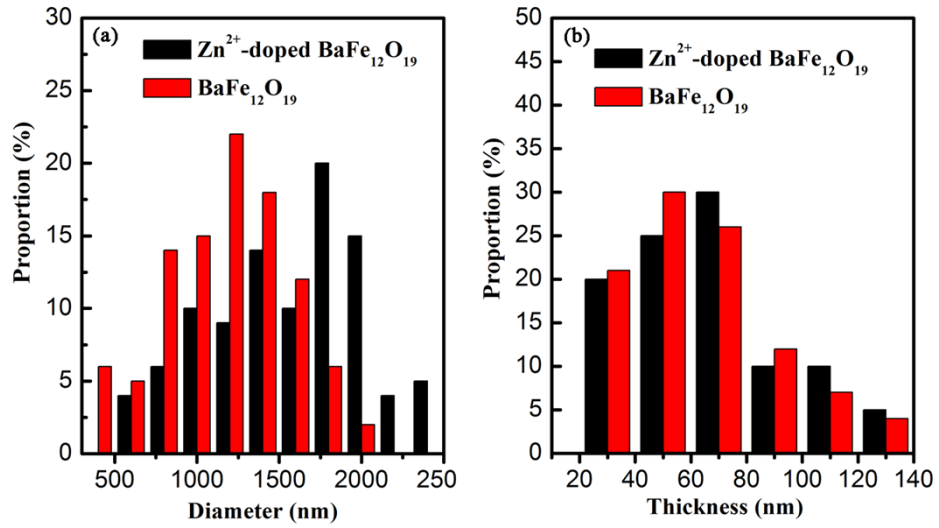

**Fig. S1.** The measured diameter size (a) and thickness (b) distribution of Zn<sup>2+</sup>-doped BaFe<sub>12</sub>O<sub>19</sub> and BaFe<sub>12</sub>O<sub>19</sub> samples

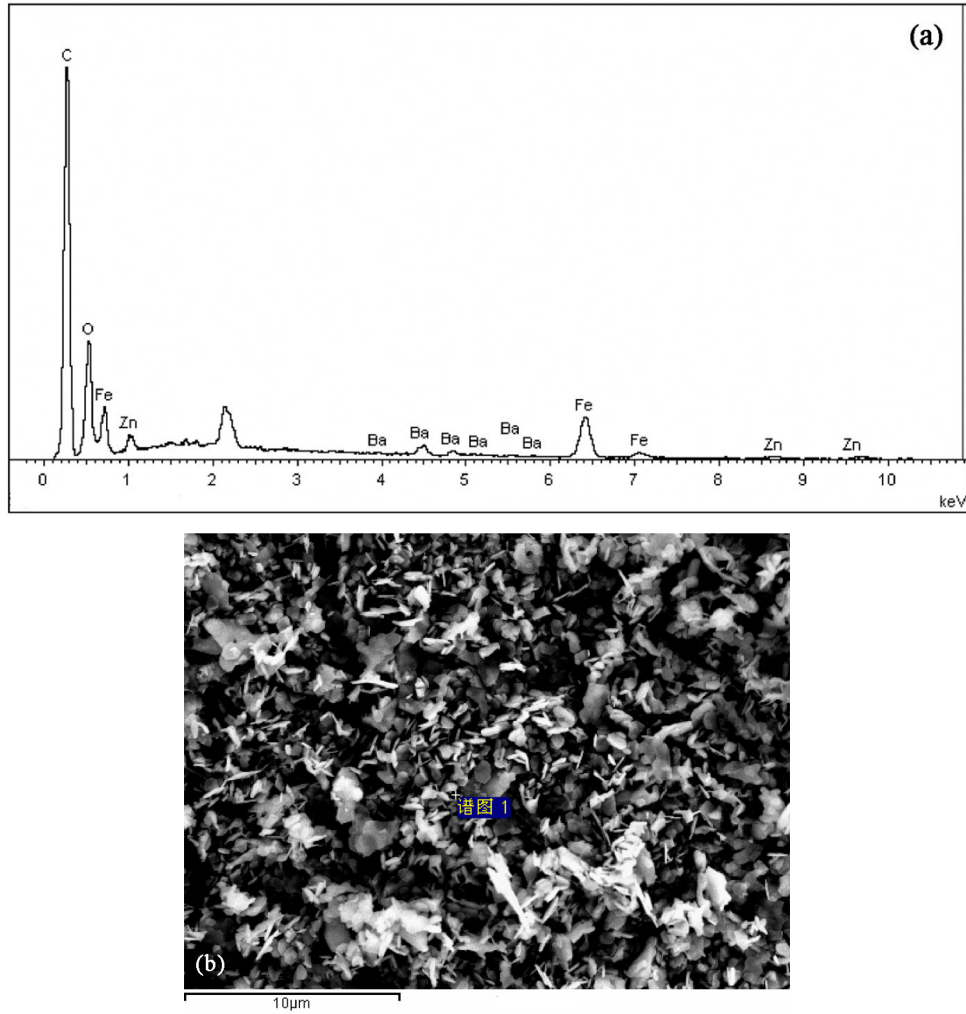

**Fig. S2.** (a) the spectrum of elements vs. binding energy of  $\text{Zn}^{2+}$ -doped  $\text{BaFe}_{12}\text{O}_{19}$  nanoplates and (b) the relevant SEM image.

Fe Fe 1-Jun-1999 12:00 AM  
 Zn Zn 1-Jun-1999 12:00 AM  
 Ba BaF2 1-Jun-1999 12:00 AM

| Element | Weight % | Molar % |
|---------|----------|---------|
| Fe K    | 35.62    | 15.22   |
| Ba L    | 9.54     | 1.66    |
| Zn L    | 1.54     | 0.55    |

**Table. S1.** the ratio of Fe, Ba and Zn in  $\text{BaFe}_{12}\text{O}_{19}$  nanoplates by EDX.
